# Supplementary material
Source: HighWire-hosted journal article supplement (https://gut.bmj.com/content/71/2/309)
Supplement: inline-supplementary-material-2 [file inline-supplementary-material-2.pdf]

**Supplementary dataset 1.**

Differentially expressed genes in the colon of CTL and CS mice.

| Gene<br>(upregulated) | Average log<br>(fold change) | Adjusted P value | Gene<br>(downregulated) | Average log<br>(fold change) | Adjusted P value |
|-----------------------|------------------------------|------------------|-------------------------|------------------------------|------------------|
| Ifit1b1               | -1.175                       | 0                | Npc2                    | 0.40119                      | 1.234E-132       |
| Duoxa2                | -0.9858                      | 4.677E-175       | 2610528A11Rik           | 0.40252                      | 5.50145E-39      |
| Clca4a                | -0.9432                      | 2.7615E-286      | Ndufa5                  | 0.40305                      | 5.2979E-143      |
| Duox2                 | -0.8403                      | 1.0162E-175      | Cox5b                   | 0.40522                      | 6.4175E-191      |
| Aqp8                  | -0.8228                      | 0                | Mpc2                    | 0.40523                      | 3.4393E-149      |
| mt-Nd3                | -0.8177                      | 1.6012E-168      | Psmc7                   | 0.40656                      | 1.9464E-147      |
| Clec2h                | -0.7382                      | 3.9895E-198      | Hint2                   | 0.40695                      | 4.3669E-167      |
| Ier5                  | -0.7131                      | 1.7412E-145      | Phb2                    | 0.40729                      | 2.2961E-140      |
| Slc9a2                | -0.6839                      | 2.6178E-169      | Cox7a1                  | 0.40846                      | 9.9667E-120      |
| Prom1                 | -0.6713                      | 2.5537E-144      | Carhsp1                 | 0.40914                      | 5.7441E-157      |
| Cdhr2                 | -0.6632                      | 3.0312E-231      | Minos1                  | 0.40982                      | 1.6787E-142      |
| St14                  | -0.6588                      | 3.8187E-167      | Tomm7                   | 0.41009                      | 1.9898E-136      |
| 2010109I03Rik         | -0.6541                      | 8.8765E-236      | Ndufv3                  | 0.41058                      | 1.087E-153       |
| Mep1a                 | -0.6443                      | 1.9258E-190      | Sec11c                  | 0.41081                      | 2.199E-158       |
| Cd38                  | -0.6426                      | 1.5406E-99       | Cyba                    | 0.41118                      | 7.2836E-169      |
| mt-Atp8               | -0.6367                      | 7.1915E-130      | H2afv                   | 0.41142                      | 3.3871E-138      |
| Ifngr1                | -0.6236                      | 5.385E-175       | Ier2                    | 0.41197                      | 2.7578E-109      |
| Emp1                  | -0.6202                      | 3.9469E-133      | Tagln2                  | 0.41392                      | 2.3151E-148      |
| Tmidg1                | -0.6163                      | 1.7573E-106      | Stard4                  | 0.41468                      | 2.19E-171        |
| 2210407C18Rik         | -0.6077                      | 5.13691E-55      | 0610011F06Rik           | 0.41544                      | 1.4503E-175      |
| Neu1                  | -0.6026                      | 9.6611E-152      | Car2                    | 0.41668                      | 4.62956E-93      |
| Irf1                  | -0.5985                      | 9.9983E-102      | Ndufb2                  | 0.41726                      | 2.056E-151       |
| Krt20                 | -0.5948                      | 4.3087E-189      | Hspd1                   | 0.41761                      | 2.9049E-149      |
| Id3                   | -0.5927                      | 1.51198E-60      | Cox5a                   | 0.41806                      | 8.2287E-180      |
| Prss23                | -0.5806                      | 1.77581E-84      | Rps271                  | 0.41924                      | 4.1195E-135      |
| Ctss                  | -0.5795                      | 9.2505E-158      | Krt18                   | 0.41949                      | 6.9484E-165      |
| Mall                  | -0.5763                      | 1.3663E-111      | Ndufs2                  | 0.41975                      | 4.1512E-161      |
| 4930539E08Rik         | -0.5702                      | 1.0554E-102      | Cox7a2                  | 0.42036                      | 1.3419E-180      |
| B3galt5               | -0.5679                      | 1.07463E-78      | Plp2                    | 0.42272                      | 2.7473E-151      |
| 1810065E05Rik         | -0.5641                      | 2.2285E-181      | Sepw1                   | 0.42323                      | 4.3651E-176      |
| Ptprr                 | -0.5607                      | 1.145E-125       | Guk1                    | 0.42379                      | 4.7571E-180      |
| Ly6a                  | -0.5604                      | 2.51263E-81      | Cyc1                    | 0.42418                      | 1.9469E-147      |
| Lhfpl2                | -0.5589                      | 2.81621E-94      | Eef2                    | 0.42431                      | 2.27555E-94      |

|          |         |             |          |         |             |
|----------|---------|-------------|----------|---------|-------------|
| Cyp2d34  | -0.5534 | 6.7575E-162 | Park7    | 0.42726 | 1.2553E-184 |
| Sgk1     | -0.5532 | 2.05942E-88 | Krt7     | 0.42815 | 1.4531E-147 |
| Hpgd     | -0.5497 | 1.0689E-66  | Uqerc1   | 0.42951 | 2.3731E-147 |
| Tmem140  | -0.5459 | 2.48224E-92 | Hsp90b1  | 0.43278 | 2.2496E-131 |
| St3gal4  | -0.5455 | 1.6503E-109 | Mrpl12   | 0.43284 | 3.6336E-166 |
| Sptlc2   | -0.5346 | 9.62428E-83 | Sec61g   | 0.43338 | 1.8982E-176 |
| Cyp2d10  | -0.5293 | 1.17982E-58 | Mrpl30   | 0.43613 | 1.0147E-180 |
| Efnal    | -0.5266 | 2.68239E-67 | Serbp1   | 0.43935 | 1.0939E-140 |
| Acox1    | -0.5249 | 6.1694E-99  | Snhg18   | 0.4401  | 6.4069E-190 |
| Gramd3   | -0.5179 | 1.08658E-58 | Ndufs5   | 0.44073 | 3.1015E-170 |
| Nuak2    | -0.5177 | 2.84082E-69 | Snrpd2   | 0.44165 | 2.0498E-174 |
| Cyp2d9   | -0.5159 | 4.23141E-84 | Fkbp2    | 0.4424  | 2.2005E-186 |
| Slc35f5  | -0.5155 | 1.38765E-73 | Fosb     | 0.4429  | 2.0465E-120 |
| Tinagl1  | -0.5033 | 9.24281E-64 | Ndufs8   | 0.44387 | 8.4369E-182 |
| Ctsl     | -0.503  | 1.10413E-88 | Ndufb7   | 0.44505 | 3.5285E-176 |
| Ctsz     | -0.5026 | 4.21024E-76 | Timm13   | 0.44639 | 2.2358E-175 |
| Ndrp1    | -0.4976 | 3.06947E-38 | Mrpl42   | 0.44775 | 9.7114E-185 |
| Fabp2    | -0.4941 | 2.23626E-71 | H2afj    | 0.44952 | 3.1744E-193 |
| Ceacam20 | -0.4919 | 6.0444E-121 | Clca1    | 0.45198 | 2.5477E-128 |
| Gcnt3    | -0.4894 | 8.59474E-42 | Sh3bgrl3 | 0.45281 | 4.1218E-212 |
| Stom     | -0.4857 | 2.3724E-74  | Sat1     | 0.45383 | 3.7777E-168 |
| Fosl2    | -0.4791 | 6.89295E-58 | B3gnt7   | 0.45862 | 6.5074E-120 |
| Max      | -0.4772 | 5.60169E-88 | Sox9     | 0.46313 | 1.5072E-189 |
| H2-Q2    | -0.4734 | 2.19657E-60 | Hspa8    | 0.46487 | 3.1438E-138 |
| Mep1b    | -0.4713 | 1.35878E-67 | Eif3h    | 0.46558 | 1.8059E-145 |
| Spp12a   | -0.4666 | 5.18949E-52 | Nme1     | 0.46703 | 2.0733E-185 |
| Nxpe4    | -0.4658 | 1.91427E-66 | Mgst2    | 0.46766 | 4.6431E-182 |
| Clrn3    | -0.4593 | 1.45452E-58 | Mgst1    | 0.46769 | 3.3448E-167 |
| Sprp2a1  | -0.4582 | 3.05833E-74 | Eef1d    | 0.46962 | 1.089E-166  |
| Irf7     | -0.4577 | 6.40962E-50 | S100a1   | 0.46968 | 3.2507E-175 |
| Casp4    | -0.4488 | 1.29922E-46 | Hoxb13   | 0.47054 | 3.8334E-161 |
| Noct     | -0.4473 | 5.64986E-56 | Psmb6    | 0.47153 | 9.0861E-196 |
| Sqstm1   | -0.4434 | 1.12881E-57 | Ndufb6   | 0.47206 | 1.0259E-185 |
| Ptprh    | -0.432  | 2.39966E-58 | Ccnd2    | 0.4791  | 1.9829E-155 |
| Mxd1     | -0.4316 | 1.6021E-132 | Nfkbia   | 0.47965 | 3.34575E-69 |
| Atp12a   | -0.4312 | 2.45763E-13 | Ndufs6   | 0.48022 | 5.6824E-190 |
| Adm      | -0.4262 | 1.74078E-28 | Ndufc2   | 0.48313 | 4.2197E-165 |
| Ccng2    | -0.4227 | 6.38759E-62 | Atp5j2   | 0.48429 | 7.7502E-244 |

|         |         |             |               |         |             |
|---------|---------|-------------|---------------|---------|-------------|
| Tmem236 | -0.4207 | 6.67841E-56 | Zfos1         | 0.48581 | 8.6108E-179 |
| Sprr2a3 | -0.4191 | 2.0109E-131 | Ndufa12       | 0.48656 | 3.2823E-190 |
| Ppm1j   | -0.4188 | 1.62366E-57 | Atp5d         | 0.48848 | 1.9808E-256 |
| Car4    | -0.4171 | 1.0575E-143 | Pfdn5         | 0.49069 | 4.0017E-219 |
| Pls1    | -0.4158 | 1.88223E-54 | Nt5c          | 0.49119 | 7.4369E-211 |
| Ncoa7   | -0.4123 | 3.87549E-20 | Ndufs7        | 0.49227 | 1.7794E-195 |
| Cables1 | -0.4069 | 2.24515E-53 | Gm10073       | 0.49309 | 1.7944E-163 |
| Ly6g    | -0.4036 | 1.32193E-23 | Fau           | 0.49356 | 0           |
| Nt5e    | -0.4033 | 5.10341E-53 | Ifitm2        | 0.49361 | 3.7085E-213 |
| Abhd2   | -0.4026 | 6.2806E-28  | Ppib          | 0.49372 | 5.0387E-189 |
|         |         |             | Eif3k         | 0.49486 | 1.4716E-168 |
|         |         |             | 1110001J03Rik | 0.50126 | 3.6841E-225 |
|         |         |             | Oaz1          | 0.50229 | 1.5577E-238 |
|         |         |             | Hsp90aa1      | 0.50441 | 3.1569E-136 |
|         |         |             | Ndufc1        | 0.5049  | 1.6616E-180 |
|         |         |             | Sult1a1       | 0.50992 | 7.9619E-198 |
|         |         |             | Aqp4          | 0.50994 | 1.7697E-164 |
|         |         |             | Tnni1         | 0.51029 | 3.1935E-157 |
|         |         |             | Fcgbp         | 0.51039 | 9.2042E-168 |
|         |         |             | S100a16       | 0.51285 | 5.7242E-227 |
|         |         |             | Eif3i         | 0.51367 | 6.6366E-183 |
|         |         |             | Pebp1         | 0.51402 | 8.9074E-167 |
|         |         |             | Cd24a         | 0.5169  | 2.4151E-179 |
|         |         |             | Ndufa11       | 0.51969 | 4.4535E-215 |
|         |         |             | Uqcrq         | 0.52023 | 1.9583E-236 |
|         |         |             | Gm5d          | 0.52162 | 2.5329E-191 |
|         |         |             | Pgls          | 0.52228 | 4.708E-220  |
|         |         |             | Prdx2         | 0.52446 | 1.2384E-214 |
|         |         |             | Serf2         | 0.52771 | 0           |
|         |         |             | Cox6c         | 0.52933 | 1.9426E-262 |
|         |         |             | Cela1         | 0.53013 | 7.9333E-188 |
|         |         |             | Ndufa2        | 0.53846 | 1.601E-247  |
|         |         |             | Gm10076       | 0.54094 | 1.0382E-199 |
|         |         |             | Ppa1          | 0.5454  | 1.5551E-212 |
|         |         |             | Cox7a2l       | 0.54868 | 2.5237E-199 |
|         |         |             | Mgst3         | 0.54891 | 1.7919E-175 |
|         |         |             | Hes1          | 0.55303 | 7.7981E-175 |
|         |         |             | Arl4a         | 0.55582 | 7.2359E-209 |

|               |         |             |
|---------------|---------|-------------|
| Ssr4          | 0.56074 | 1.0874E-213 |
| Ptms          | 0.56275 | 1.3554E-241 |
| Wbp5          | 0.56591 | 4.4411E-166 |
| Egr1          | 0.57583 | 1.3523E-186 |
| Rnf186        | 0.58545 | 2.9722E-202 |
| Ndufb8        | 0.58587 | 4.3783E-251 |
| Sec61b        | 0.59134 | 4.9213E-201 |
| Stard10       | 0.59322 | 2.2869E-217 |
| Hist1h2ap     | 0.59451 | 5.3452E-99  |
| Eif3f         | 0.59583 | 1.6843E-179 |
| Ndufb10       | 0.60295 | 3.7312E-266 |
| Atp5c1        | 0.60338 | 3.5342E-238 |
| Acta1         | 0.60519 | 1.7634E-157 |
| Phlda1        | 0.60579 | 2.7428E-187 |
| Ndufb11       | 0.61091 | 2.9188E-244 |
| Ppp1r1b       | 0.61117 | 7.0388E-238 |
| Rpl27         | 0.61228 | 2.656E-208  |
| Rpl41         | 0.61435 | 0           |
| Hint1         | 0.61767 | 0           |
| Gpx1          | 0.61997 | 5.1391E-264 |
| Ndufa13       | 0.6209  | 0           |
| Atp5o         | 0.62232 | 0           |
| Mrps24        | 0.63041 | 2.7236E-270 |
| Npm1          | 0.63181 | 7.6327E-164 |
| Hspe1         | 0.64688 | 7.7774E-210 |
| Atp5l         | 0.64911 | 0           |
| Krt19         | 0.65047 | 0           |
| Ndufab1       | 0.65083 | 2.2422E-255 |
| Mrpl52        | 0.65186 | 9.4515E-249 |
| Ndufa7        | 0.65368 | 2.3008E-273 |
| Hmgcs2        | 0.65576 | 4.6047E-243 |
| Selm          | 0.65814 | 5.3699E-193 |
| Smim6         | 0.66138 | 1.155E-255  |
| Atp5h         | 0.66162 | 0           |
| 2410015M20Rik | 0.66259 | 0           |
| Ifrd1         | 0.66423 | 6.2041E-243 |
| Tstd1         | 0.6643  | 1.4532E-239 |
| Cyr61         | 0.66631 | 3.6798E-217 |

|         |         |             |
|---------|---------|-------------|
| Rps27   | 0.66873 | 0           |
| Nupr1   | 0.67021 | 2.985E-228  |
| Gsdmc4  | 0.67284 | 1.0793E-192 |
| Klf5    | 0.67477 | 3.8234E-222 |
| Ndufa4  | 0.67702 | 3.0896E-216 |
| Ndufb5  | 0.67707 | 1.3145E-253 |
| Zg16    | 0.68127 | 2.113E-229  |
| Ndufb9  | 0.68296 | 0           |
| Tppp3   | 0.6838  | 9.3389E-199 |
| Chchd10 | 0.68384 | 0           |
| Uqcr11  | 0.6894  | 0           |
| Eef1g   | 0.6943  | 1.4072E-192 |
| Wfdc2   | 0.69487 | 2.4778E-236 |
| Hsd11b2 | 0.69522 | 9.6151E-167 |
| Scd2    | 0.69668 | 8.2174E-275 |
| Thbs1   | 0.69743 | 1.5433E-228 |
| Atpif1  | 0.70176 | 0           |
| Uqcr10  | 0.71142 | 0           |
| Tpt1    | 0.71169 | 0           |
| Cox4i1  | 0.71308 | 0           |
| Hao2    | 0.71932 | 2.5011E-213 |
| Nans    | 0.7217  | 1.5472E-269 |
| Atp5e   | 0.72588 | 0           |
| Glul    | 0.73071 | 0           |
| Rps29   | 0.7407  | 0           |
| Rpl36al | 0.74486 | 3.4271E-251 |
| Mat2a   | 0.74898 | 2.7673E-249 |
| Uqcrh   | 0.75237 | 0           |
| Rps25   | 0.76301 | 7.7979E-242 |
| Naca    | 0.76375 | 2.8723E-259 |
| Nr4a1   | 0.76554 | 2.9463E-228 |
| Tff3    | 0.76588 | 0           |
| Oit1    | 0.76678 | 0           |
| Gdf15   | 0.77432 | 1.5844E-250 |
| Ptma    | 0.77572 | 1.9942E-201 |
| Rpl18   | 0.78183 | 0           |
| Rpl24   | 0.79677 | 1.9309E-295 |
| Rpl31   | 0.80078 | 1.7233E-286 |

---

|        |         |             |
|--------|---------|-------------|
| Rpl38  | 0.80263 | 0           |
| Rpl30  | 0.80531 | 3.477E-252  |
| Rpl15  | 0.80897 | 2.6877E-225 |
| Uba52  | 0.8093  | 0           |
| Atp5g2 | 0.81433 | 0           |
| Hbegf  | 0.81765 | 1.7588E-297 |
| Klk1   | 0.83037 | 6.9026E-300 |
| Rpl37  | 0.83315 | 0           |
| Csrp2  | 0.8414  | 1.2442E-286 |
| Rpl22  | 0.84262 | 2.9237E-280 |
| Rps21  | 0.87945 | 1.3048E-301 |
| Rpl5   | 0.88043 | 2.7329E-254 |
| Pycard | 0.88484 | 0           |
| Eef1b2 | 0.89384 | 1.3385E-264 |
| Areg   | 0.89564 | 1.9164E-302 |
| Rpl7   | 0.90133 | 5.1969E-298 |
| Rpl19  | 0.90389 | 0           |
| Rpl9   | 0.90454 | 0           |
| Rpl4   | 0.91344 | 2.7824E-273 |
| Rpl23a | 0.91625 | 0           |
| Rps28  | 0.91954 | 1.3633E-279 |
| Rpl7a  | 0.92002 | 0           |
| Rps20  | 0.92763 | 0           |
| Rpl17  | 0.94891 | 0           |
| Rpl29  | 0.95917 | 0           |
| Rps13  | 0.96061 | 0           |
| Rps16  | 0.96098 | 0           |
| Rps26  | 0.96562 | 0           |
| Rpl23  | 0.96642 | 0           |
| Gpx2   | 0.96785 | 0           |
| Rpl11  | 0.97381 | 0           |
| Rpl28  | 0.97704 | 0           |
| Rps10  | 0.98074 | 0           |
| Atp5g1 | 0.98238 | 0           |
| Atf3   | 0.98587 | 0           |
| Rpl34  | 0.98693 | 0           |
| Rpl35a | 0.9871  | 0           |
| Rps11  | 0.99213 | 0           |

---

|          |         |             |
|----------|---------|-------------|
| Rpl6     | 1.00015 | 0           |
| Rpl18a   | 1.00206 | 0           |
| Hsp90ab1 | 1.00502 | 1.0781E-300 |
| Gnb2l1   | 1.024   | 1.1653E-298 |
| Eef1a1   | 1.02895 | 0           |
| Rpl8     | 1.03004 | 0           |
| Rpl22l1  | 1.03265 | 0           |
| Rps15a   | 1.03313 | 0           |
| Rpl21    | 1.03335 | 0           |
| Rpl13a   | 1.04495 | 0           |
| Rpl12    | 1.04995 | 0           |
| Rpl10    | 1.05107 | 0           |
| Rps15    | 1.07035 | 0           |
| Rps3a1   | 1.07942 | 0           |
| Rpl27a   | 1.08931 | 0           |
| Rps3     | 1.0894  | 0           |
| Rplp2    | 1.09329 | 0           |
| Rps23    | 1.09967 | 0           |
| Rps17    | 1.1035  | 0           |
| Ppia     | 1.10471 | 0           |
| Rpsa     | 1.10491 | 0           |
| Rpl37a   | 1.10502 | 0           |
| Ccl6     | 1.11304 | 5.055E-252  |
| Rps6     | 1.12028 | 0           |
| Rps7     | 1.12571 | 0           |
| Rpl36a   | 1.13601 | 0           |
| Rpl39    | 1.14609 | 0           |
| Rplp1    | 1.1558  | 0           |
| Rpl14    | 1.16849 | 0           |
| Rpl13    | 1.17374 | 0           |
| Rps9     | 1.17521 | 0           |
| Rps24    | 1.17981 | 0           |
| Rps14    | 1.19664 | 0           |
| Rpl26    | 1.23881 | 0           |
| Rps12    | 1.24126 | 0           |
| Rps27a   | 1.24184 | 0           |
| Rps5     | 1.24987 | 0           |
| Rpl36    | 1.25373 | 0           |

---

|        |         |   |
|--------|---------|---|
| Rpl3   | 1.2592  | 0 |
| Rplp0  | 1.2714  | 0 |
| Rps8   | 1.27706 | 0 |
| Muc2   | 1.28174 | 0 |
| Rpl35  | 1.28692 | 0 |
| Rps4x  | 1.32447 | 0 |
| Rps2   | 1.3387  | 0 |
| Rps19  | 1.35505 | 0 |
| Rps18  | 1.38048 | 0 |
| Rpl32  | 1.40799 | 0 |
| Sval1  | 1.43648 | 0 |
| Rpl10a | 1.45522 | 0 |
| Reg4   | 1.50425 | 0 |
| Agr2   | 1.97307 | 0 |
| Spink4 | 2.2038  | 0 |
| Mptx1  | 2.91614 | 0 |

---

**Supplementary dataset 2.**

Differentially expressed genes in the colon of CS and CS+Pg mice.

| Gene<br>(upregulated) | Average log<br>(fold change) | Adjusted P value | Gene<br>(downregulated) | Average log<br>(fold change) | Adjusted P value |
|-----------------------|------------------------------|------------------|-------------------------|------------------------------|------------------|
| Hbb-bs                | -3.267233944                 |                  | 0 Prr15l                | 0.402527665                  | 4.64943E-97      |
| Mptx1                 | -2.214149839                 |                  | 0 Tspan3                | 0.413094551                  | 8.29438E-82      |
| Ang4                  | -1.463565786                 |                  | 0 Ddit4                 | 0.4135868                    | 9.98774E-46      |
| Gsdmc4                | -1.362834016                 |                  | 0 Mep1a                 | 0.424437353                  | 1.1023E-100      |
| Plet1                 | -1.275291355                 |                  | 0 Nudt4                 | 0.425405731                  | 9.5047E-111      |
| Gsdmc2                | -1.272086627                 |                  | 0 Cldn4                 | 0.426168512                  | 4.67471E-24      |
| Retnlb                | -1.228736262                 |                  | 0 Ugdh                  | 0.474302378                  | 3.6889E-111      |
| Spink4                | -1.180058462                 |                  | 0 Dusp1                 | 0.481313476                  | 3.05854E-65      |
| Phlda1                | -0.935554542                 |                  | 0 Sepp1                 | 0.491244893                  | 3.42E-174        |
| Duoxa2                | -0.855883234                 |                  | 0 Tmem171               | 0.495882824                  | 1.44812E-81      |
| Fcgbp                 | -0.827350936                 | 1.214E-273       | Fam134b                 | 0.49714498                   | 8.7107E-100      |
| Duox2                 | -0.645098192                 | 8.5088E-186      | Max                     | 0.518984765                  | 1.9062E-122      |
| Clea1                 | -0.629445997                 | 4.342E-177       | Mkrl1                   | 0.526623621                  | 4.5849E-185      |
| Hk2                   | -0.569430978                 | 3.8537E-156      | Prss23                  | 0.58344447                   | 1.625E-105       |
| Agr2                  | -0.544803388                 | 4.9527E-104      | Ctss                    | 0.584630804                  | 1.001E-185       |
| Trim40                | -0.5429663                   | 3.2296E-171      | Hpgd                    | 0.65214054                   | 4.1862E-132      |
| Tnip3                 | -0.540176983                 | 3.8636E-154      | Tgm3                    | 0.761811001                  | 7.6488E-188      |
| Ncoa7                 | -0.527796486                 | 2.0558E-109      | Mt1                     | 0.92469553                   | 7.77047E-85      |
| Rps24                 | -0.526010514                 | 1.0906E-126      | Sgk1                    | 0.954893973                  | 2.4675E-288      |
| Cd55                  | -0.524011985                 | 1.021E-176       |                         |                              |                  |
| Ccdc71l               | -0.496846841                 | 6.9679E-127      |                         |                              |                  |
| Sprr1a                | -0.483765703                 | 1.3293E-100      |                         |                              |                  |
| Rplp1                 | -0.481972953                 | 4.5074E-125      |                         |                              |                  |
| Rps12                 | -0.4801035                   | 5.79768E-93      |                         |                              |                  |
| Rpl10a                | -0.471483049                 | 3.37E-113        |                         |                              |                  |
| Rplp2                 | -0.467895971                 | 8.4983E-116      |                         |                              |                  |
| Slc6a14               | -0.466924878                 | 2.8476E-104      |                         |                              |                  |
| Rpl39                 | -0.464562788                 | 2.3016E-135      |                         |                              |                  |
| Trim15                | -0.461999597                 | 1.478E-120       |                         |                              |                  |
| Rpl32                 | -0.461551033                 | 2.1693E-117      |                         |                              |                  |
| Areg                  | -0.459214439                 | 2.2407E-100      |                         |                              |                  |
| Pigr                  | -0.457981981                 | 1.4858E-170      |                         |                              |                  |
| Atpif1                | -0.444364373                 | 6.4976E-137      |                         |                              |                  |
| Rps18                 | -0.444006139                 | 3.2123E-97       |                         |                              |                  |

---

|          |              |             |
|----------|--------------|-------------|
| AY036118 | -0.439897901 | 2.18E-146   |
| Rps15    | -0.437589628 | 1.1387E-91  |
| Slc51b   | -0.43531282  | 8.6994E-112 |
| Rps14    | -0.432033822 | 5.6372E-157 |
| Vmp1     | -0.428841743 | 3.1142E-116 |
| Muc2     | -0.428652553 | 4.01495E-93 |
| Rpl35    | -0.425960426 | 2.80854E-86 |
| Rrbp1    | -0.420205797 | 1.3887E-121 |
| Sptssb   | -0.416350119 | 1.0525E-82  |
| Rpl36    | -0.413083169 | 2.22886E-97 |
| Rps2     | -0.411612551 | 6.41015E-69 |
| Rps4x    | -0.410467469 | 1.27059E-82 |
| Rpl13a   | -0.409620636 | 4.40792E-76 |
| Tstd1    | -0.405202906 | 1.0887E-104 |
| Rpl37a   | -0.40503853  | 4.1677E-117 |
| Rps15a   | -0.403839409 | 8.02576E-86 |
| Slc5a8   | -0.400503152 | 5.2096E-103 |

---

**Supplementary dataset 3.**

Differentially expressed genes in the lung of CTL and CS mice.

| Gene<br>(upregulated) | Average log<br>(fold change) | Adjusted P value | Gene<br>(downregulated) | Average log<br>(fold change) | Adjusted P value |
|-----------------------|------------------------------|------------------|-------------------------|------------------------------|------------------|
| Ig1c2                 | -0.9118                      | 5.7E-32          | Prdx5                   | 0.40833                      | 1E-08            |
| Cd79a                 | -0.9115                      | 1.8E-55          | Cd9                     | 0.40956                      | 0.00025          |
| Cd79b                 | -0.8658                      | 1.9E-52          | Lmnb1                   | 0.41513                      | 3.7E-05          |
| Ighm                  | -0.865                       | 1.6E-39          | Lst1                    | 0.42051                      | 3.7E-14          |
| Igkc                  | -0.7647                      | 9.9E-29          | Fcer1g                  | 0.42686                      | 1.1E-20          |
| Cd74                  | -0.6977                      | 2.3E-36          | Pglyrp1                 | 0.43044                      | 5.5E-06          |
| H2-Ab1                | -0.6949                      | 7.8E-37          | Ifitm3                  | 0.45893                      | 6.9E-14          |
| Ighd                  | -0.6869                      | 4.7E-43          | Clec4d                  | 0.46042                      | 2.1E-15          |
| H2-DMb2               | -0.6633                      | 2.3E-40          | Grina                   | 0.46948                      | 4.5E-09          |
| Ms4a1                 | -0.6504                      | 2.8E-36          | Ccl5                    | 0.47609                      | 5.6E-24          |
| Ly6d                  | -0.6321                      | 5.4E-27          | Hbb-bs                  | 0.48121                      | 2.1E-49          |
| H2-Eb1                | -0.6099                      | 6.3E-34          | S100a6                  | 0.48431                      | 2.4E-12          |
| Fcmm                  | -0.6                         | 3E-37            | Cox17                   | 0.48691                      | 3.6E-07          |
| H2-Aa                 | -0.5889                      | 9.8E-33          | Ifi2712a                | 0.52876                      | 1.3E-09          |
| Ebf1                  | -0.5093                      | 7E-33            | S100a8                  | 0.54451                      | 4.5E-93          |
| H2-DMa                | -0.4775                      | 1.6E-26          | Tyrobp                  | 0.54703                      | 2.7E-33          |
| Ly6e                  | -0.4721                      | 3.6E-24          | Msrb1                   | 0.54907                      | 8.5E-11          |
| Scd1                  | -0.4522                      | 2E-27            | Slc7a11                 | 0.55274                      | 2.9E-15          |
| Id3                   | -0.4288                      | 1.9E-20          | Cebpb                   | 0.56157                      | 1.8E-20          |
| Mef2c                 | -0.4182                      | 2.6E-19          | C5ar1                   | 0.56475                      | 4.7E-15          |
| Ptprcap               | -0.4155                      | 2.8E-23          | Hdc                     | 0.59107                      | 1E-16            |
| H2-Ob                 | -0.4107                      | 4.4E-19          | S100a9                  | 0.64289                      | 9E-122           |
|                       |                              |                  | Ifitm2                  | 0.65068                      | 1.2E-34          |
|                       |                              |                  | Cd14                    | 0.68076                      | 1.1E-16          |
|                       |                              |                  | Il1r2                   | 0.75909                      | 2.8E-25          |
|                       |                              |                  | Scgbla1                 | 2.18708                      | 1E-296           |

**Supplementary dataset 4.**

Differentially expressed genes in the lung of CS and CS+Pg mice.

| Gene<br>(upregulated) | Average log<br>(fold change) | Adjusted P value | Gene<br>(downregulated) | Average log<br>(fold change) | Adjusted P value |
|-----------------------|------------------------------|------------------|-------------------------|------------------------------|------------------|
| Scgb1a1               | -1.9779                      | 5E-231           | Cd37                    | 0.4069                       | 4.3E-19          |
| Wfdc17                | -1.0097                      | 4E-14            | Ebf1                    | 0.44106                      | 5.3E-20          |
| Ifitm2                | -0.8556                      | 5.4E-23          | H2-DMa                  | 0.44354                      | 1.5E-18          |
| Cd14                  | -0.8247                      | 1.1E-14          | Ly6e                    | 0.45866                      | 3.2E-22          |
| S100a9                | -0.802                       | 4.7E-62          | Cd81                    | 0.46265                      | 3.1E-19          |
| Cebpb                 | -0.8008                      | 2.1E-37          | Iglc2                   | 0.50118                      | 6E-13            |
| S100a8                | -0.7995                      | 2.1E-55          | Igkc                    | 0.52325                      | 1.2E-17          |
| Ifitm3                | -0.7125                      | 7.2E-17          | Fcmr                    | 0.56835                      | 1.4E-26          |
| Ifi2712a              | -0.5776                      | 2.4E-09          | H2-DMb2                 | 0.61811                      | 1.6E-28          |
| Slpi                  | -0.5647                      | 9.4E-08          | H2-Eb1                  | 0.62076                      | 1.1E-26          |
| Grina                 | -0.5492                      | 0.00013          | Apoe                    | 0.6447                       | 3E-14            |
| Clec4d                | -0.4998                      | 2E-11            | H2-Aa                   | 0.65503                      | 7.4E-33          |
| Anxa1                 | -0.4732                      | 1.1E-09          | Cd79b                   | 0.67693                      | 2.1E-34          |
| Fcer1g                | -0.4496                      | 1.4E-09          | H2-Ab1                  | 0.70707                      | 8.2E-32          |
| S100a6                | -0.4353                      | 2.4E-06          | Ighm                    | 0.70757                      | 2E-29            |
| Pglyrp1               | -0.4332                      | 0.04941          | Cd74                    | 0.71084                      | 1.7E-38          |
| Il1r2                 | -0.4312                      | 2.4E-07          | Ighd                    | 0.72306                      | 6.5E-34          |
| Plek                  | -0.4277                      | 6.6E-05          | Cd79a                   | 0.7922                       | 5.8E-36          |
| Tyrobp                | -0.4009                      | 2.7E-08          |                         |                              |                  |
